# Supplementary material for: Anti-Growth, Anti-Angiogenic, and Pro-Apoptotic Effects by CX-4945, an Inhibitor of Casein Kinase 2, on HuCCT-1 Human Cholangiocarcinoma Cells via Control of Caspase-9/3, DR-4, STAT-3/STAT-5, Mcl-1, eIF-2α, and HIF-1α
Source: MDPI journal article supplement (doi:10.3390/ijms23116353), 2022-06-06
Supplement: s1 [file s1]

**Table S1: List of antibodies used for Western blot analysis.**

| <b>Antibodies</b>                  | <b>Dilution used</b> | <b>Source</b>                          | <b>Catalog no.</b> |
|------------------------------------|----------------------|----------------------------------------|--------------------|
| <i><b>Primary antibodies</b></i>   |                      |                                        |                    |
| Procaspase-3                       | 1:2,000              | Enzo Life Sciences                     | ADI-AAP-113        |
| Procaspase-9                       | 1:2000               | Enzo Life Sciences                     | ADI-AAP-139        |
| PARP                               | 1:2,000              | Cell signalling                        | #9532              |
| DR-4                               | 1:2,000              | Santa Cruz Biotechnology               | sc-8411            |
| p-CK2 $\alpha$                     | 1:2,000              | Sigma                                  | 111411572          |
| CK2 $\alpha$                       | 1:2,000              | Cell signalling                        | #2656              |
| p-CK2 substrates                   | 1:2,000              | Cell signalling                        | #8738              |
| p-eIF-2 $\alpha$ (S51)             | 1:2,000              | Abcam                                  | ab32157            |
| eIF-2 $\alpha$                     | 1:2,000              | Cell signalling                        | #9722              |
| p-STAT-3 (Y705)                    | 1:2,000              | Santa Cruz Biotechnology               | sc-8059            |
| STAT-3                             | 1:2,000              | Santa Cruz Biotechnology               | sc-8019            |
| p-STAT-5                           | 1:2,000              | Santa Cruz Biotechnology               | sc-101806          |
| STAT-5                             | 1:2,000              | Santa Cruz Biotechnology               | sc-835             |
| HIF-1 $\alpha$                     | 1:2,000              | BD Biosciences                         | 610958             |
| HIF-1 $\beta$                      | 1:2,000              | Santa Cruz Biotechnology               | sc-17811           |
| Mcl-1                              | 1:2,000              | Santa Cruz Biotechnology               | sc-819             |
| $\beta$ -Actin                     | 1:10,000             | Sigma                                  | A5441              |
| <i><b>Secondary antibodies</b></i> |                      |                                        |                    |
| Goat anti-rabbit IgG-<br>HRP       | 1:5000               | Jackson ImmunoResearch<br>Laboratories | 111-035-045        |
| Goat anti-mouse-IgG-<br>HRP        | 1:5000               | Jackson ImmunoResearch<br>Laboratories | 115-035-062        |

**Table S2: Sequences of primers used for RT-PCR.**

| <b>Gene</b>    | <b>Forward</b>        | <b>Reverse</b>        |
|----------------|-----------------------|-----------------------|
| STAT-3         | CAAAACCCTCAAGAGCCAAG  | TCACTCACAATGCTTCTCCG  |
| Mcl-1          | ATCTCTCGGTACCTTCGGGAG | ACCAGCTCCTACTCCAGCAAC |
| HIF-1 $\alpha$ | CTCAAAGTCGGACAGCCTCA  | CCCTGCAGTAGGTTTCTGCT  |
| HIF-1 $\beta$  | GTGCGCACACATGCTTCTGT  | CTTTATGGCCAAGTCTCGGGT |
| Actin          | TCAAGATCATTGCTCCTCCTG | CTGCTTGCTGATCCACATCTG |
